# **Impairment of zebrafish reproduction upon exposure to melengestrol acetate**

Kewen Xiong, Chunyun Zhong, Xin Wang

Department of Environmental Toxicity, Third Hospital of Shanxi University

Keywords: Melengestrol acetate; reproduction; Endocrine disruption; progestin

## **Abstract**

Synthetic progestins contamination is common in the aquatic ecosystem, which may lead to serious health problem on aquatic animals. Melengestrol acetate (MGA) has been detected in the aquatic environment; however, its potential effects on fish reproduction are largely unclear. Here, we aimed to investigate the endocrine disruption and impact of MGA on zebrafish reproduction. Six-month old reproductive zebrafish were exposed to four nominal concentrations of MGA (1, 10, 100 and 200 ng/L) for 15 days. Treatment with MGA reduced the egg production with a significant decrease at 200 ng/L. The circulating concentrations of estradiol and testosterone in female zebrafish or 11-keto testosterone in male zebrafish were significantly diminished compared to the non-exposed control fish. The early embryonic development or hatching rates were unaffected during the MGA exposure. Our results indicated that MGA was a potent endocrine disruptor in fish and the fish reproduction could be impaired even during a short-term exposure to MGA.

## Introduction

The normal endocrine functions of aquatic animals can be disturbed by the contaminants present in the aquatic environments [1, 2]. Most of the active compounds are detected in the environment are endocrine-disrupting chemicals, including natural and synthetic steroid [3-6]. Previous studies have reported the adverse effects of natural and synthetic steroidal estrogens on aquatic organisms, such as  $17\beta$ -estradiol,  $17\alpha$ -estradiol, estrone, mestranol, ethinylestradiol [7-12]. However, little is known about the effects of MGA to the environmental health. Progestins have been widely used in veterinary medicine and hormonal therapies [13-15]. These chemicals have been found in sewage treatment plants, pharmaceutical industries and agricultural areas and are now world widely environmental pollution [16-18]. MGA is one of the most commonly used synthetic growth promoters, which is excreted in feces and urine of cattle [19]. MGA is an orally active progestagenic drug that has been used as a feed additive to beef cattle. It is primarily excreted from cattle unmodified and is very stable in soil and manure [19]. Several studies have reported changes in hormone concentrations, reproduction and morphology changes in aquatic organisms after exposure to trenbolone acetate or metabolites [20-26]. Studies investigating MGA effects in aquatic organisms are virtually unknown. Recently, natural progesterone or synthetic progestins have been reported that may result in endocrine disruption and impair reproduction in fish [12, 18, 27-32]. However, little is known about the potential underlying mechanisms. Even the synthetic progestins are widely used

and detected in the environment; few researches have reported the hazards and their risk to the environment and the aquatic organisms. Currently, it is not known whether MGA had any effect on the reproduction in fish.

Therefore, we investigated the effect of MGA on the reproduction of zebrafish exposed to four nominal concentrations of MGA (1, 10, 100 and 200 ng/L). We also examined the sex hormone levels in zebrafish. The present study showed that MGA inhibited zebrafish reproduction in a dose-dependent manner after short-term treatment.

## **Materials and methods**

### **Chemicals**

Melengestrol acetate (MGA, 17 $\alpha$ -Acetoxy-6-methyl-16-methylene-4,6-pregnadiene-3,20-dione, Cat. No. 33998) and DMSO (Dimethyl sulfoxide, Cat. No. D8418) were purchased from Sigma-Aldrich. MGA stock solution (1 mg/mL) was dissolved in DMSO and stored at -20 °C. All the other reagents used in this study were of analytical grade.

### **Zebrafish husbandry**

Six-month-old zebrafish AB line was maintained normally (temperature, 28 °C; pH 7.2-7.4; 14 hr on and 10 hr off light cycle).

### **MGA treatment**

The fish were housed in 50-L tanks with 30 L of water. Three replicate tanks containing 20 males and 20 females each were used. In order to obtain tank-specific baseline data for potential statistical comparison after initiation of chemical exposure, all the fish were maintained for a 14-day pre-exposure period. After the pre-exposure period and all the female fish have been successful spawned for several times, chemical treatment was then performed. The zebrafish were treated with different concentration of MGA (1, 10, 100 and 200 ng/L) or equal concentration of vehicle solution for 15 days, and the zebrafish embryos were collected daily. The water of the tanks exposed to MGA was changed daily. After 15 days of treatment with MGA, the eggs were collected and divided into two groups. One group was exposed to the same concentration of MGA (1, 10, 100 and 200 ng/L), and the other group received 0.001% (v/v) DMSO as the control.

### **Tissue collection**

After exposing to MGA for 15 days, the adult fish were anesthetized in 0.04% Tricaine (Sigma-Aldrich, Cat. No. A5040). Blood samples were collected from the caudal vein of the fish; the gonad were dissected and immediately stored at -80 °C for further analysis.

### **Hormone measurement**

Blood samples from three adult fish of the same gender were pooled, centrifuged (6,000 g for 10 min) at 4 °C to obtain the plasma. Plasma extraction and the

measurement of the sex hormone levels were performed as described previously [33].

### **Statistical analysis**

All experiments were repeated three times independently. A one-way analysis of variance (ANOVA) with Tukey's multiple comparisons was used to detect significant differences between the control and treated groups. Data were recorded as the mean with SD  $\pm$  SE. A  $p < 0.05$  was considered statistically significant.

### **Results**

#### **Fish growth and survival**

In the adult zebrafish groups, all the fish were survived after 15 days MGA treatment. MGA exposure had no obvious effect on the growth of adult fish, and on the hatching and malformation rates in the F1 embryos. All the hatching rates were over 90% and the malformation rates were lower than 5%.

#### **Reproduction**

As shown in Fig. 1, embryos production was consistent and similar during the pre-exposure period among all groups. In the 15-days exposure period, female fish treated with 200 ng/L MGA spawned fewer eggs compared to the control group from day 10 to day 15. Other tested concentration of MGA showed slight inhibitory effect on the fish reproduction.

## **Sex hormone levels**

In the female fish, treating with 10, 100 and 200 ng/L of MGA significantly reduced the plasma E2 levels by 25%, 47% and 70%, respectively (Fig. 2A). Meanwhile, the testosterone levels were diminished by 15%, 22% and 30% in the 10, 100 and 200 ng/L of MGA exposure groups, respectively (Fig. 2B). The plasma 11-KT levels were reduced by 42%, 55% and 61% after treatment with 10, 100 and 200 ng/L of MGA, respectively (Fig. 2C).

## **Discussion**

The synthetic progestins have recently been reported that may result in endocrine disruption and inhibit reproduction in fish [18, 27, 34, 35]. However, the toxicological effects and mechanisms of the synthetic progestin MGA on fish have not been evaluated yet. In this study, we found that the zebrafish reproduction could be impaired when exposing to MGA at the relevant environmental concentrations. The 11-KT levels in male zebrafish and the E2 and testosterone levels in female zebrafish were significantly diminished in MGA treated groups.

There were no significant differences in embryos hatching, survival rate and developmental malformation during the exposure. In fish, one of the key ecologically indicators of endocrine disruption is the embryos production in females [36]. MGA exposure caused significant decrease in the egg production, which has not been reported till date. Recently, similar effects of MTA and EE2 with different combinations of progestins on fish fecundity have been reported [37, 38]. Hence, the potential risks of synthetic hormone to the fish species should be highlighted.

Future studies are required to investigate the potential mechanisms of the hormonal effects on fish fecundity.

## References

1. Tanabe, S., *Contamination and toxic effects of persistent endocrine disrupters in marine mammals and birds*. Marine pollution bulletin, 2002. **45**(1): p. 69-77.
2. Vos, J.G., et al., *Health effects of endocrine-disrupting chemicals on wildlife, with special reference to the European situation*. Critical reviews in toxicology, 2000. **30**(1): p. 71-133.
3. Segner, H., et al., *Identification of endocrine-disrupting effects in aquatic vertebrates and invertebrates: report from the European IDEA project*. Ecotoxicology and environmental safety, 2003. **54**(3): p. 302-314.
4. Guillette Jr, L.J., et al., *Alligators and endocrine disrupting contaminants: a current perspective 1*. American Zoologist, 2000. **40**(3): p. 438-452.
5. Rotchell, J. and G. Ostrander, *Molecular markers of endocrine disruption in aquatic organisms*. Journal of Toxicology and Environmental Health Part B: Critical Reviews, 2003. **6**(5): p. 453-496.
6. Zhai, G., et al., *Sept6 is required for ciliogenesis in Kupffer's vesicle, the pronephros, and the neural tube during early embryonic development*. Molecular and cellular biology, 2014. **34**(7): p. 1310-1321.
7. Lai, K., M. Scrimshaw, and J. Lester, *The effects of natural and synthetic steroid estrogens in relation to their environmental occurrence*. Critical reviews in toxicology, 2002. **32**(2): p. 113-132.
8. Baronti, C., et al., *Monitoring natural and synthetic estrogens at activated sludge sewage treatment plants and in a receiving river water*. Environmental Science & Technology, 2000. **34**(24): p. 5059-5066.
9. Lai, K., M. Scrimshaw, and J. Lester, *Prediction of the bioaccumulation factors and body burden of natural and synthetic estrogens in aquatic organisms in the river systems*. Science of the Total Environment, 2002. **289**(1): p. 159-168.
10. Thorpe, K.L., et al., *Relative potencies and combination effects of steroidal estrogens in fish*. Environmental science & technology, 2003. **37**(6): p. 1142-1149.
11. Länge, R., et al., *Effects of the synthetic estrogen 17  $\alpha$  - ethinylestradiol on the life - cycle of the fathead minnow (*Pimephales promelas*)*. Environmental Toxicology and Chemistry, 2001. **20**(6): p. 1216-1227.
12. Zhong, L., et al., *Investigation of effect of 17 $\alpha$ -ethinylestradiol on vigilin expression using an isolated recombinant antibody*. Aquatic toxicology, 2014. **156**: p. 1-9.
13. Boxall, A., et al., *Are veterinary medicines causing environmental risks?* USGS Staff--Published Research, 2003: p. 67.

14. Díaz-Cruz, M.S., M.J.L. de Alda, and D. Barcelo, *Environmental behavior and analysis of veterinary and human drugs in soils, sediments and sludge*. TrAC Trends in Analytical Chemistry, 2003. **22**(6): p. 340-351.
15. Yang, X., et al., *Nucleoporin 62-like protein activates canonical Wnt signaling through facilitating the nuclear import of  $\beta$ -catenin in zebrafish*. Molecular and cellular biology, 2015. **35**(7): p. 1110-1124.
16. Guillette, L.J., *Endocrine disrupting contaminants-beyond the dogma*. Environmental health perspectives, 2006. **114**: p. 9.
17. Pal, A., et al., *Impacts of emerging organic contaminants on freshwater resources: review of recent occurrences, sources, fate and effects*. Science of the Total Environment, 2010. **408**(24): p. 6062-6069.
18. Runnalls, T.J., et al., *Several synthetic progestins with different potencies adversely affect reproduction of fish*. Environmental science & technology, 2013. **47**(4): p. 2077-2084.
19. Schiffer, B., et al., *The fate of trenbolone acetate and melengestrol acetate after application as growth promoters in cattle: environmental studies*. Environmental health perspectives, 2001. **109**(11): p. 1145.
20. Ankley, G.T., et al., *Effects of the androgenic growth promoter 17 -  $\beta$  - trenbolone on fecundity and reproductive endocrinology of the fathead minnow*. Environmental Toxicology and Chemistry, 2003. **22**(6): p. 1350-1360.
21. Leet, J.K., H.E. Gall, and M.S. Sepúlveda, *A review of studies on androgen and estrogen exposure in fish early life stages: effects on gene and hormonal control of sexual differentiation*. Journal of Applied Toxicology, 2011. **31**(5): p. 379-398.
22. Ankley, G.T., et al., *Description and evaluation of a short - term reproduction test with the fathead minnow (*Pimephales promelas*)*. Environmental Toxicology and Chemistry, 2001. **20**(6): p. 1276-1290.
23. Milla, S., S. Depiereux, and P. Kestemont, *The effects of estrogenic and androgenic endocrine disruptors on the immune system of fish: a review*. Ecotoxicology, 2011. **20**(2): p. 305-319.
24. Morthorst, J.E., H. Holbech, and P. Bjerregaard, *Trenbolone causes irreversible masculinization of zebrafish at environmentally relevant concentrations*. Aquatic Toxicology, 2010. **98**(4): p. 336-343.
25. Khan, B., L.S. Lee, and S.A. Sassman, *Degradation of synthetic androgens 17 $\alpha$ - and 17 $\beta$ -trenbolone and trendione in agricultural soils*. Environmental science & technology, 2008. **42**(10): p. 3570-3574.
26. Gu, Q., et al., *Genetic ablation of solute carrier family 7a3a leads to hepatic steatosis in zebrafish during fasting*. Hepatology, 2014. **60**(6): p. 1929-1941.
27. Zeilinger, J., et al., *Effects of synthetic gestagens on fish reproduction*. Environmental Toxicology and Chemistry, 2009. **28**(12): p. 2663-2670.
28. Vajda, A.M., et al., *Reproductive disruption in fish downstream from an estrogenic wastewater effluent*. Environmental science & technology, 2008. **42**(9): p. 3407-3414.



29. DeQuattro, Z.A., et al., *Effects of progesterone on reproduction and embryonic development in the fathead minnow (Pimephales promelas)*. Environmental toxicology and chemistry, 2012. **31**(4): p. 851-856.
30. Paulos, P., et al., *Reproductive responses in fathead minnow and Japanese medaka following exposure to a synthetic progestin, Norethindrone*. Aquatic Toxicology, 2010. **99**(2): p. 256-262.
31. Gu, Q., et al., *Generation and characterization of a transgenic zebrafish expressing the reverse tetracycline transactivator*. Journal of Genetics and Genomics, 2013. **40**(10): p. 523-531.
32. Song, G., et al., *Effective gene trapping mediated by Sleeping Beauty transposon*. PloS one, 2012. **7**(8): p. e44123.
33. Wang, Q., et al., *Exposure of zebrafish embryos/larvae to TDCPP alters concentrations of thyroid hormones and transcriptions of genes involved in the hypothalamic-pituitary-thyroid axis*. Aquatic toxicology, 2013. **126**: p. 207-213.
34. Sumpter, J.P. and A.C. Johnson, *Lessons from endocrine disruption and their application to other issues concerning trace organics in the aquatic environment*. Environmental Science & Technology, 2005. **39**(12): p. 4321-4332.
35. Siegenthaler, P.F., et al., *Effects of antiandrogenic progestins, chlormadinone and cyproterone acetate, and the estrogen 17 $\alpha$ -ethinylestradiol (EE2), and their mixtures: Transactivation with human and rainbowfish hormone receptors and transcriptional effects in zebrafish (Danio rerio) eleuthero-embryos*. Aquatic Toxicology, 2017. **182**: p. 142-162.
36. Arcand - Hoy, L.D. and W.H. Benson, *Fish reproduction: an ecologically relevant indicator of endocrine disruption*. Environmental toxicology and chemistry, 1998. **17**(1): p. 49-57.
37. Maasz, G., et al., *Complex molecular changes induced by chronic progestogens exposure in roach, Rutilus rutilus*. Ecotoxicology and environmental safety, 2017. **139**: p. 9-17.
38. Hua, J., et al., *The binary mixtures of megestrol acetate and 17 $\alpha$ -ethinylestradiol adversely affect zebrafish reproduction*. Environmental Pollution, 2016. **213**: p. 776-784.

## Figure Legends

Figure 1. Effect of MGA exposure on the reproduction of female zebrafish.

Fig.1

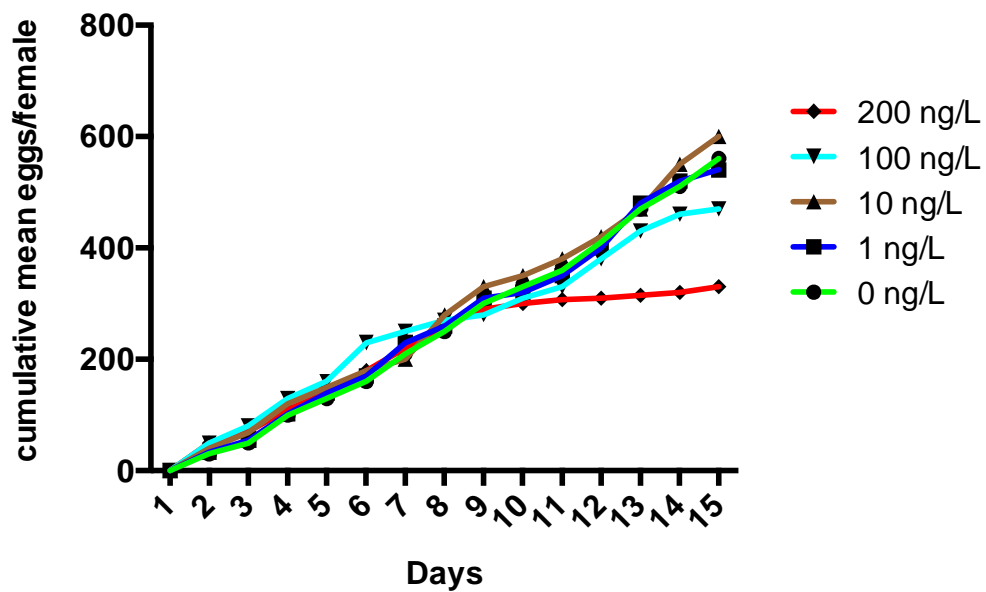

**Figure 2. Effect of MGA treatment on plasma concentrations of E2 (A), testosterone (B) in female fish and 11-ketotestosterone (C) in male fish.**

Fig.2A

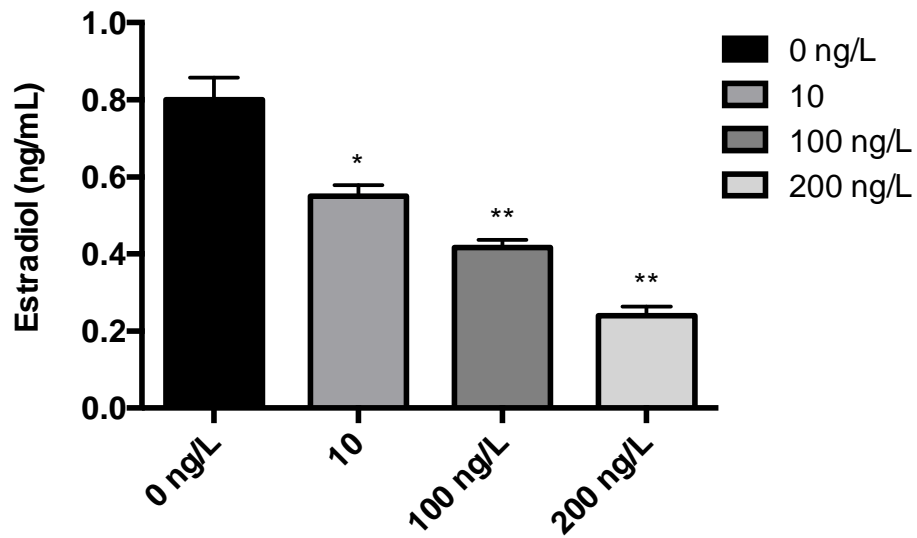

Fig.2B

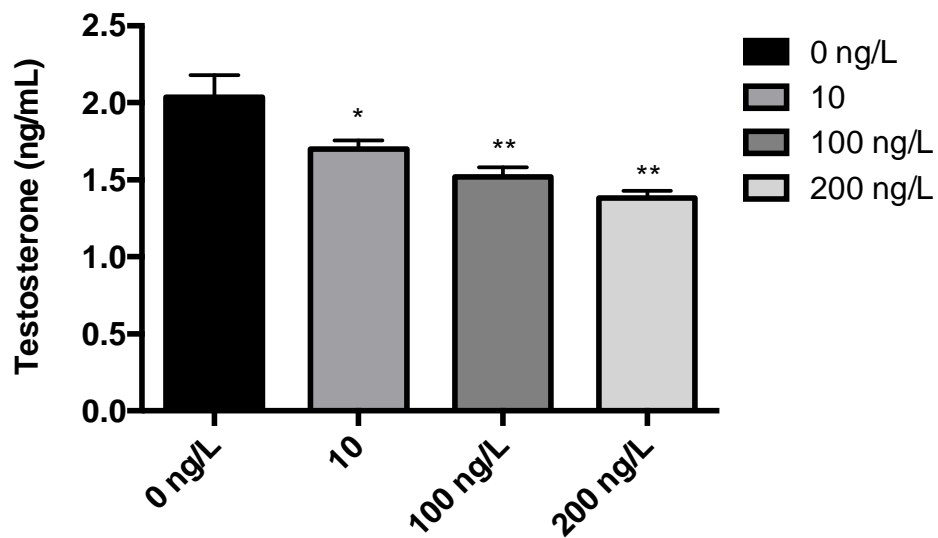

Fig.2C

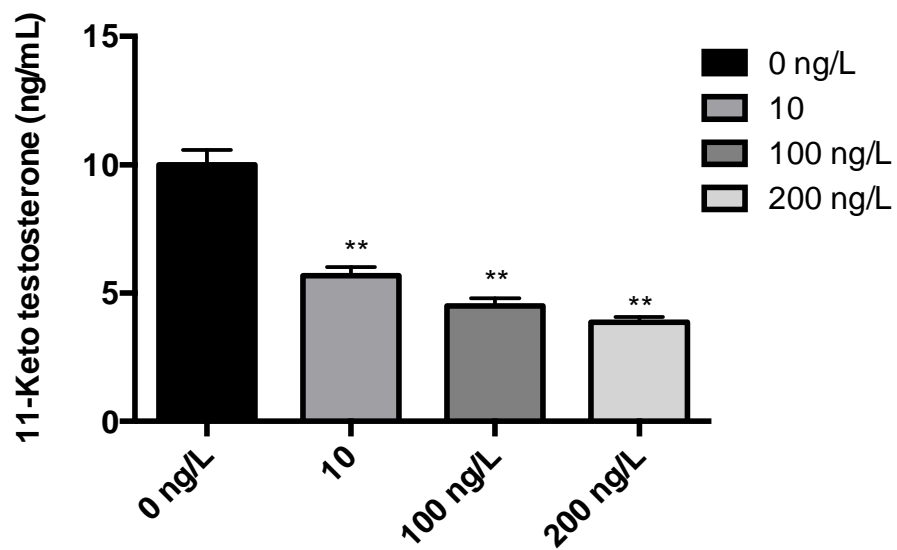

Source: https://www.biorxiv.org/content/10.1101/146506.full.pdf
